# Supplementary material for: USP5/Leon deubiquitinase confines postsynaptic growth by maintaining ubiquitin homeostasis through Ubiquilin
Source: eLife. 2017 May 10;6:e26886. doi: 10.7554/eLife.26886 (PMC5438252; doi:10.7554/eLife.26886)
Supplement: Supplementary file 1. — DOI: http://dx.doi.org/10.7554/eLife.26886.021 [file elife-26886-supp1.xls]

## Sheet: Quantification of figures
Figure 1B
genotype	bouton number	n	Student's t test
w1118	78.47 ± 2.37	27	--
leon2/19-2	59.13 ± 3.01	31	p < 0.001 to w1118
leon1/19-2	56.92 ± 3.13	25	p < 0.001 to w1118
GFP-leon-GR, leon1/19-2	75.81 ±1.8	21	p = 0.33 to w1118 ; p < 0.001 to leon1/19-2
Figure 1C
genotype	branch length	n	Student's t test
w1118	314.32 ± 11.01	12	--
leon2/19-2	281.03 ± 17.62	13	p = 0.12 to w1118
leon1/19-2	223.46 ± 10.14	12	p < 0.001 to w1118
GFP-leon-GR, leon1/19-2	311.04 ± 12.19	12	p = 0.84 to w1118 ; p < 0.001 to leon1/19-2
Figure 1D
genotype	muscle area (x104 mm2)	n	Student's t test
w1118	5.14 ± 0.09	37	--
leon2/19-2	5.44 ± 0.14	31	p = 0.09 to w1118
leon1/19-2	5.02 ± 0.22	28	p = 0.6 to w1118
GFP-leon-GR, leon1/19-2	5.58 ± 0.22	14	p = 0.08 to w1118 ; p = 0.07 to leon1/19-2
Figure 1F
genotype	bouton number	n	Student's t test
24B-GAL4	75.71 ± 4.07	17	--
24B-GAL4, leon1/19-2	60.35 ± 2.59	17	p < 0.001 to 24B-GAL4
24B>leon, leon1/19-2	72.37 ± 2.55	19	p < 0.01 to mutant ; p = 0.49 to 24B-GAL4
24B>ED-leon, leon1/19-2	62.29 ± 2.71	13	p = 0.53 to mutant ; p < 0.05 to 24B-GAL4
Figure 1H
genotype	bouton number	n	Student's t test
D42GAL4	80.32 ± 3.04	19	--
D42-GAL4, leon1/19-2	59.06 ± 3.71	17	p < 0.001 to D42-GAL4
D42>leon, leon1/19-2	58.83 ± 2.72	23	p = 0.96 to mutant ; p < 0.001 to D42-GAL4
D42>ED-leon, leon1/19-2	63.32 ± 2.31	19	p = 0.34 to mutant ; p < 0.001 to D42-GAL4
Figure 1-figure supplement 1C
genotype	bouton number	n	Student's t test
24B-GAL4	79.35 ± 2.66	20	--
24B>leon-RNAi	61.5 ± 2.99	20	p < 0.001 to 24B-GAL4
D42-GAL4	80.04 ± 2.41	23	--
D42>leon-RNAi	78.7 ± 2.64	23	p = 0.71 to D42-GAL4
Figure 3E
genotype	Dlg zone thickness (mm)	n	Student's t test
w1118	0.6 ± 0.01	27	--
leon2/19-2	1.01 ± 0.02	29	p < 0.001
leon1/19-2	1.64 ± 0.05	29	p < 0.001
Figure 3E
genotype	dPak intensity (fold)	n	Student's t test
w1118	1 ± 0.06	10	--
leon2/19-2	1.57 ± 0.12	9	p < 0.01
leon1/19-2	2.06 ± 0.1	10	p < 0.001
Figure 3E
genotype	GluRIIA intensity (fold)	n	Student's t test
w1118	1 ± 0.06	10	--
leon2/19-2	1.48 ± 0.1	10	p < 0.01
leon1/19-2	1.63 ± 0.07	10	p < 0.001
Figure 3E
genotype	GluRIIA diameter (mm)	n	Student's t test
w1118	0.63 ± 0.01	308	--
leon2/19-2	0.96 ± 0.01	288	p < 0.001
leon1/19-2	1.19 ± 0.02	281	p < 0.001
Figure 3G
genotype	Dlg zone thickness (mm)	n	Student's t test
24B-GAL4	0.62 ± 0.02	26	--
24B-GAL4, leon1/19-2	1.62 ± 0.06	26	p < 0.001 to 24B-GAL4
24B>leon, leon1/19-2	0.64 ± 0.02	27	p < 0.001 to mutant ; p = 0.61 to 24B-GAL4
24B>ED-leon, leon1/19-2	1.60 ± 0.06	25	p = 0.82 to mutant ; p < 0.001 to 24B-GAL4
Figure 3G
genotype	dPak intensity (fold)	n	Student's t test
24B-GAL4	1 ± 0.08	10	--
24B-GAL4, leon1/19-2	1.67 ± 0.05	10	p < 0.001 to 24B-GAL4
24B>leon, leon1/19-2	1.05 ± 0.1	10	p < 0.001 to mutant ; p = 0.71 to 24B-GAL4
24B>ED-leon, leon1/19-2	1.83 ± 0.12	10	p = 0.27 to mutant ; p < 0.001 to 24B-GAL4
Figure 3G
genotype	GluRIIA intensity (fold)	n	Student's t test
24B-GAL4	1 ± 0.1	10	--
24B-GAL4, leon1/19-2	1.64 ± 0.16	10	p < 0.001 to 24B-GAL4
24B>leon, leon1/19-2	1.07 ± 0.03	10	p < 0.01 to mutant ; p = 0.5 to 24B-GAL4
24B>ED-leon, leon1/19-2	1.68 ± 0.09	10	p = 0.84 to mutant ; p < 0.001 to 24B-GAL4
Figure 3G
genotype	GluRIIA diameter (mm)	n	Student's t test
24B-GAL4	0.61 ± 0.01	271	--
24B-GAL4, leon1/19-2	1.1 ± 0.01	287	p < 0.001 to 24B-GAL4
24B>leon, leon1/19-2	0.60 ± 0.01	281	p < 0.001 to mutant ; p = 0.31 to 24B-GAL4
24B>ED-leon, leon1/19-2	1.07 ± 0.01	277	p = 0.07 to mutant ; p < 0.001 to 24B-GAL4
Figure 3-figure supplement 1B
genotype	Brp density (#/mm2)	n	Student's t test
w1118	1.41 ± 0.07	10	--
leon2/19-2	1.32 ± 0.05	10	p = 0.28
leon1/19-2	1.55 ± 0.08	10	p = 0.21
Figure 3-figure supplement 1B
genotype	GluRIIB intensity (fold)	n	Student's t test
w1118	1 ± 0.07	10	--
leon2/19-2	1.24 ± 0.08	10	p < 0.05
leon1/19-2	2.01 ± 0.15	10	p < 0.001
Figure 3-figure supplement 1B
genotype	GluRIIC intensity (fold)	n	Student's t test
w1118	1 ± 0.07	10	--
leon2/19-2	1.31 ± 0.1	10	p < 0.05
leon1/19-2	1.52 ± 0.08	10	p < 0.001
Figure 3-figure supplement 2C
genotype	Cact zone thickness (mm)	n	Student's t test
w1118 72hr	0.43 ± 0.01	37	--
leon2/19-2 72hr	0.55 ± 0.01	34	p < 0.001 to w1118 72hr
leon1/19-2 72hr	0.6 ± 0.02	35	p < 0.001 to w1118 72hr
w1118 96hr	0.65 ± 0.02	37	--
leon2/19-2 96hr	0.88 ± 0.02	39	p < 0.001 to w1118 96hr
leon1/19-2 96hr	1.1 ± 0.03	37	p < 0.001 to w1118 96hr
w1118 120hr	0.65 ± 0.02	35	--
leon2/19-2 120hr	0.95 ± 0.03	36	p < 0.001 to w1118 120hr
leon1/19-2 120hr	1.14 ± 0.03	36	p < 0.001 to w1118 120hr
Figure 3-figure supplement 2C
genotype	GluRIIA intensity (fold)	n	Student's t test
w1118 72hr	1 ± 0.09	10	--
leon2/19-2 72hr	1.35 ± 0.11	10	p < 0.05 to w1118 72hr
leon1/19-2 72hr	1.53 ± 0.1	10	p < 0.001 to w1118 72hr
w1118 96hr	1.54 ± 0.1	10	--
leon2/19-2 96hr	1.84 ± 0.06	10	p < 0.05 to w1118 96hr
leon1/19-2 96hr	1.88 ± 0.06	10	p < 0.05 to w1118 96hr
w1118 120hr	1.92 ± 0.13	10	--
leon2/19-2 120hr	2.39 ± 0.18	10	p < 0.05 to w1118 120hr
leon1/19-2 120hr	2.48 ± 0.11	10	p < 0.01 to w1118 120hr
Figure 3-figure supplement 2C
genotype	GluRIIA diameter (mm)	n	Student's t test
w1118 72hr	0.39 ± 0.003	435	--
leon2/19-2 72hr	0.44 ± 0.004	383	p < 0.001 to w1118 72hr
leon1/19-2 72hr	0.49 ± 0.005	365	p < 0.001 to w1118 72hr
w1118 96hr	0.5 ± 0.004	462	--
leon2/19-2 96hr	0.53 ± 0.004	431	p < 0.001 to w1118 96hr
leon1/19-2 96hr	0.62 ± 0.006	411	p < 0.001 to w1118 96hr
w1118 120hr	0.63 ± 0.004	440	--
leon2/19-2 120hr	0.79 ± 0.005	464	p < 0.001 to w1118 120hr
leon1/19-2 120hr	0.85 ± 0.006	470	p < 0.001 to w1118 120hr
Figure 3-figure supplement 3B
genotype	Dlg zone thickness (mm)	n	Student's t test
D42-GAL4	0.69 ± 0.02	31	--
D42-GAL4, leon1/19-2	1.39 ± 0.04	32	p < 0.001 to D42-GAL4
D42>leon, leon1/19-2	1.41 ± 0.04	35	p = 0.73 to mutant ; p < 0.001 to D42-GAL4
D42>ED-leon, leon1/19-2	1.39 ± 0.04	32	p = 0.93 to mutant ; p < 0.001 to D42-GAL4
Figure 3-figure supplement 3B
genotype	dPak intensity (fold)	n	Student's t test
D42-GAL4	1 ± 0.04	10	--
D42-GAL4, leon1/19-2	1.54 ± 0.1	10	p < 0.001 to D42-GAL4
D42>leon, leon1/19-2	1.79 ± 0.13	10	p = 0.14 to mutant ; p < 0.001 to D42-GAL4
D42>ED-leon, leon1/19-2	1.73 ± 0.16	10	p = 0.32 to mutant ; p < 0.01 to D42-GAL4
Figure 3-figure supplement 3B
genotype	GluRIIA intensity (fold)	n	Student's t test
D42-GAL4	1 ± 0.05	10	--
D42-GAL4, leon1/19-2	1.5 ± 0.09	10	p < 0.001 to D42-GAL4
D42>leon, leon1/19-2	1.6 ± 0.14	10	p = 0.56 to mutant ; p < 0.01 to D42-GAL4
D42>ED-leon, leon1/19-2	1.43 ± 0.11	10	p = 0.63 to mutant ; p < 0.01 to D42-GAL4
Figure 3-figure supplement 3B
genotype	GluRIIA diameter (mm)	n	Student's t test
D42-GAL4	0.65 ± 0.004	376	--
D42-GAL4, leon1/19-2	1 ± 0.01	344	p < 0.001 to D42-GAL4
D42>leon, leon1/19-2	1 ± 0.01	382	p = 0.81 to mutant ; p < 0.001 to D42-GAL4
D42>ED-leon, leon1/19-2	0.99 ± 0.01	391	p = 0.73 to mutant ; p < 0.001 to D42-GAL4
Figure 3-figure supplement 4C
genotype	Dlg zone thickness (mm)	n	Student's t test
24B-GAL4	0.62 ± 0.02	25	--
24B>leon-RNAi	0.9 ± 0.02	26	p < 0.001 to 24B-GAL4
D42-GAL4	0.61 ± 0.02	27	--
D42>leon-RNAi	0.62 ± 0.02	26	p = 0.69 to D42-GAL4
Figure 3-figure supplement 4C
genotype	dPak intensity (fold)	n	Student's t test
24B-GAL4	1 ± 0.07	10	--
24B>leon-RNAi	1.46 ± 0.16	10	p < 0.05 to 24B-GAL4
D42-GAL4	1 ± 0.09	10	--
D42>leon-RNAi	0.82 ± 0.1	10	p = 0.2 to D42-GAL4
Figure 3-figure supplement 4C
genotype	GluRIIA intensity (fold)	n	Student's t test
24B-GAL4	1 ± 0.04	10	--
24B>leon-RNAi	1.32 ± 0.09	10	p < 0.01 to 24B-GAL4
D42-GAL4	1 ± 0.09	10	--
D42>leon-RNAi	0.86 ± 0.07	10	p = 0.24 to D42-GAL4
Figure 3-figure supplement 4C
genotype	GluRIIA diameter (mm)	n	Student's t test
24B-GAL4	0.61 ± 0.01	267	--
24B>leon-RNAi	0.82 ± 0.01	275	p < 0.001 to 24B-GAL4
D42-GAL4	0.62 ± 0.01	279	--
D42>leon-RNAi	0.61 ± 0.01	261	p = 0.5 to D42-GAL4
Figure 4C
genotype	bouton area (mm2)	n	Student's t test
w1118	3.94 ± 0.43	30	--
19-2/19-2	5.13 ± 0.44	35	p = 0.06
leon1/19-2	4.78 ± 0.45	36	p = 0.18
Figure 4C
genotype	SSR area (mm2)	n	Student's t test
w1118	7.25 ± 0.68	30	--
19-2/19-2	13.83 ± 1.39	35	p < 0.001
leon1/19-2	18.35 ± 1.78	36	p < 0.001
Figure 4C
genotype	synaptic length (mm)	n	Student's t test
w1118	0.63 ± 0.03	130	--
19-2/19-2	0.88 ± 0.03	254	p < 0.001
leon1/19-2	1.00 ± 0.04	210	p < 0.001
Figure 4C
genotype	T-bars/per bouton	n	Student's t test
w1118	1.67 ± 0.26	30	--
19-2/19-2	1.29 ± 0.17	35	p = 0.23
leon1/19-2	1.86 ± 0.24	36	p = 0.59
Figure 4C
genotype	Vesicle number/bouton area	n	Student's t test
w1118	140.94 ± 13.47	19	--
19-2/19-2	151.86 ± 12.06	19	p = 0.55
leon1/19-2	182.7 ± 19.14	19	p = 0.08
Figure 5A
genotype	mEJC frequency (Hz)	n	Student's t test
+/19-2	4.04 ± 0.34	14	--
19-2/19-2	5.02 ± 0.37	13	p = 0.06 to +/19-2
leon1/19-2	3.66 ± 0.39	12	p = 0.48 to +/19-2
GFP-leon-GR/+, 19-2/19-2	4.54 ± 0.42	13	p = 0.4 to 19-2/19-2; p = 0.36 to +/19-2
GFP-leon-GR/+, leon1/19-2	3.89 ± 0.35	13	p = 0.66 to leon1/19-2; p = 0.77 to +/19-2
genotype	mEJC amplitude (pA)	n	Student's t test
+/19-2	829.3 ± 31.59	14	--
19-2/19-2	928.57 ± 42.62	13	p = 0.07 to +/19-2
leon1/19-2	913.3 ± 43.74	12	p = 0.13 to +/19-2
GFP-leon-GR/+, 19-2/19-2	872.78 ± 49.48	13	p = 0.4 to 19-2/19-2; p = 0.47 to +/19-2
GFP-leon-GR/+, leon1/19-2	865.71 ± 25.53	13	p = 0.36 to leon1/19-2; p = 0.38 to +/19-2
genotype	EJC amplitude (nA)	n	Student's t test
+/19-2	30.15 ± 2.43	14	--
19-2/19-2	14.51 ±1.56	13	p < 0.001 to +/19-2
leon1/19-2	18.21 ± 2.37	12	p < 0.01 to +/19-2
GFP-leon-GR/+, 19-2/19-2	30.5 ± 1.83	13	p < 0.001 to 19-2/19-2; p = 0.91 to +/19-2
GFP-leon-GR/+, leon1/19-2	39.13 ± 4.77	13	p < 0.01 to leon1/19-2; p = 0.11 to +/19-2
genotype	quantal content	n	Student's t test
+/19-2	37.35 ± 3.41	14	--
19-2/19-2	21.19 ± 5.29	13	p < 0.001 to +/19-2
leon1/19-2	20.83 ± 3.03	12	p < 0.01 to +/19-2
GFP-leon-GR/+, 19-2/19-2	36.47 ± 3.13	13	p < 0.001 to 19-2/19-2; p = 0.85 to +/19-2
GFP-leon-GR/+, leon1/19-2	45.89 ± 5.83	13	p < 0.01 to leon1/19-2; p = 0.22 to +/19-2
Figure 5B
genotype	mEJC frequency (Hz)	n	Student's t test
D42-GAL4	2.26 ± 0.26	9	--
D42-GAL4, leon1/19-2	5.05 ± 0.78	10	p < 0.01 to D42-GAL4
UAS-leon, leon1/19-2	3.85 ± 0.56	10	p < 0.05 to D42-GAL4
D42>UAS-leon, leon1/19-2	3.06 ± 0.53	9	p = 0.21 to D42-GAL4; p = 0.053 to D42-GAL4, leon1/19-2; p = 0.32 to UAS-leon, leon1/19-2
genotype	mEJC amplitude (pA)	n	Student's t test
D42-GAL4	673.73 ± 23.98	9	--
D42-GAL4, leon1/19-2	978.85 ± 81.53	10	p < 0.01 to D42-GAL4
UAS-leon, leon1/19-2	910.31 ± 60.8	10	p < 0.01 to D42-GAL4
D42>UAS-leon, leon1/19-2	898.28 ± 49.7	9	p < 0.01 to D42-GAL4; p = 0.41 to D42-GAL4, leon1/19-2; p = 0.88 to UAS-leon, leon1/19-2
genotype	EJC amplitude (nA)	n	Student's t test
D42-GAL4	40.8 ± 3.57	9	--
D42-GAL4, leon1/19-2	21.71 ± 2.47	10	p < 0.001 to D42-GAL4
UAS-leon, leon1/19-2	23.08 ± 4.35	10	p < 0.01 to D42-GAL4
D42>UAS-leon, leon1/19-2	24.21 ± 3.83	9	p < 0.01 to D42-GAL4; p = 0.59 to D42-GAL4, leon1/19-2; p = 0.85 to UAS-leon, leon1/19-2
genotype	quantal content	n	Student's t test
D42-GAL4	61.27 ± 5.72	9	--
D42-GAL4, leon1/19-2	22.08 ± 2.6	10	p < 0.001 to D42-GAL4
UAS-leon, leon1/19-2	24.79 ± 4.09	10	p < 0.001 to D42-GAL4
D42>UAS-leon, leon1/19-2	23.4 ± 3.88	9	p < 0.001 to D42-GAL4; p = 0.78 to D42-GAL4, leon1/19-2; p = 0.81 to UAS-leon, leon1/19-2
Figure 5C
genotype	mEJC frequency (Hz)	n	Student's t test
24B-GAL4	2.13 ± 0.2	18	--
24B-GAL4, leon1/19-2	3.87 ± 0.38	19	p < 0.001 to 24B-GAL4
UAS-leon, leon1/19-2	4.1 ± 0.61	15	p < 0.01 to 24B-GAL4
24B>UAS-leon, leon1/19-2	2.64 ± 0.17	18	p = 0.054 to 24B-GAL4; p < 0.01 to 24B-GAL4, leon1/19-2; p < 0.05 to UAS-leon, leon1/19-2
genotype	mEJC amplitude (pA)	n	Student's t test
24B-GAL4	628.62 ± 21.33	18	--
24B-GAL4, leon1/19-2	779.62 ± 51.84	19	p < 0.05 to 24B-GAL4
UAS-leon, leon1/19-2	846.38 ± 48.41	15	p < 0.001 to 24B-GAL4
24B>UAS-leon, leon1/19-2	775.07 ± 30.25	18	p < 0.001 to 24B-GAL4; p = 0.94 to 24B-GAL4, leon1/19-2; p = 0.22 to UAS-leon, leon1/19-2
genotype	EJC amplitude (nA)	n	Student's t test
24B-GAL4	48.05 ± 3.2	18	--
24B-GAL4, leon1/19-2	22.83 ± 2.27	19	p < 0.001 to 24B-GAL4
UAS-leon, leon1/19-2	20.81 ± 1.71	15	p < 0.001 to 24B-GAL4
24B>UAS-leon, leon1/19-2	31.47 ± 1.65	18	p < 0.001 to 24B-GAL4; p < 0.01 to 24B-GAL4, leon1/19-2; p < 0.001 to UAS-leon, leon1/19-2
genotype	quantal content	n	Student's t test
24B-GAL4	77.32 ± 5.32	18	--
24B-GAL4, leon1/19-2	31.41 ± 3.36	19	p < 0.001 to 24B-GAL4
UAS-leon, leon1/19-2	25.4 ± 2.48	15	p < 0.001 to 24B-GAL4
24B>UAS-leon, leon1/19-2	41.64 ± 2.89	18	p < 0.001 to 24B-GAL4; p < 0.05 to 24B-GAL4, leon1/19-2; p < 0.001 to UAS-leon, leon1/19-2
Figure 5-figure supplement 1A
genotype	mEJC amplitude (pA)	n	Student's t test
w1118	689.1 ± 56.75	10	--
+/19-2	709.66 ± 46.61	10	p = 0.78 to w1118
leon1/19-2	777.05 ± 60.22	10	p = 0.3 to w1118; p = 0.39 to +/19-2
Figure 5-figure supplement 1B
genotype	quantal content (failure analysis)	n	Student's t test
w1118	1.22 ± 0.09	10	--
+/19-2	1.32 ± 0.18	10	p = 0.5 to w1118
leon1/19-2	0.76 ± 0.12	9	p < 0.01 to w1118; p < 0.01 to +/19-2
Figure 6B
genotype	Cact zone thickness (mm)	n	Student's t test
leon1/19-2	1.60 ± 0.06	32	--
dlgX1-2/+; leon1/19-2	1.08 ± 0.04	27	p < 0.001
leon1, +/19-2, dpak6	1.64 ± 0.06	31	p = 0.59
leon1, +/19-2, pll25	1.5 ± 0.05	31	p = 0.21
dlH/+; leon1/19-2	1.46 ± 0.04	33	p = 0.07
Figure 6B
genotype	GluRIIA intensity (fold)	n	Student's t test
leon1/19-2	1 ± 0.09	10	--
dlgX1-2/+; leon1/19-2	0.85 ± 0.05	10	p = 0.17
leon1, +/19-2, dpak6	0.58 ± 0.03	10	p < 0.01
leon1, +/19-2, pll25	0.62 ± 0.01	10	p < 0.01
dlH/+; leon1/19-2	0.73 ± 0.05	10	p < 0.05
Figure 6B
genotype	GluRIIA diameter (mm)	n	Student's t test
leon1/19-2	1.14 ± 0.02	292	--
dlgX1-2/+; leon1/19-2	1.1 ± 0.01	297	p = 0.06
leon1, +/19-2, dpak6	0.67 ± 0.01	293	p < 0.001
leon1, +/19-2, pll25	0.74 ± 0.01	335	p < 0.001
dlH/+; leon1/19-2	0.71 ± 0.01	345	p < 0.001
Figure 6D
genotype	Dlg zone thickness (mm)	n	Student's t test
leon1/19-2	1.58 ± 0.03	33	--
cact13/+; leon1/19-2	1.52 ± 0.03	32	p = 0.17
Figure 6D
genotype	GluRIIA intensity (fold)	n	Student's t test
leon1/19-2	1 ± 0.09	10	--
cact13/+; leon1/19-2	0.57 ± 0.04	10	p < 0.01
Figure 6D
genotype	GluRIIA diameter (mm)	n	Student's t test
leon1/19-2	1.04 ± 0.01	334	--
cact13/+; leon1/19-2	0.7 ± 0.004	336	p < 0.001
Figure 6-figure supplement 1D
genotype	GFP zone thickness (mm)	n	Student's t test
24B>mCD8GFP, leon1/19-2	1.46 ± 0.04	25	--
24B>mCD8GFP, dlgRNAi , leon1/19-2	1.02 ± 0.02	25	p < 0.001
24B>mCD8GFP, dpakRNAi , leon1/19-2	0.95 ± 0.03	25	p < 0.001
24B>mCD8GFP, pllRNAi , leon1/19-2	1.41 ± 0.04	25	p = 0.38
24B>mCD8GFP, dl-BRNAi , leon1/19-2	1.39 ± 0.03	25	p = 0.19
24B>mCD8GFP, cactRNAi , leon1/19-2	1.35 ± 0.03	25	p = 0.11
Figure 6-figure supplement 1D
genotype	GluRIIA intensity (fold)	n	Student's t test
24B-GAL4, leon1/19-2	1 ± 0.09	10	--
24B>dlgRNAi , leon1/19-2	0.99 ± 0.06	10	p = 0.9
24B>dpakRNAi , leon1/19-2	0.59 ± 0.06	10	p < 0.01
24B>pllRNAi , leon1/19-2	0.6 ± 0.03	10	p < 0.01
24B>dl-BRNAi , leon1/19-2	0.56 ± 0.04	10	p < 0.001
24B>cactRNAi , leon1/19-2	0.51 ± 0.05	10	p < 0.001
Figure 6-figure supplement 1D
genotype	GluRIIA diameter (mm)	n	Student's t test
24B-GAL4, leon1/19-2	0.98 ± 0.01	275	--
24B>dlgRNAi , leon1/19-2	0.97 ± 0.01	271	p = 0.12
24B>dpakRNAi , leon1/19-2	0.78 ± 0.01	284	p < 0.001
24B>pllRNAi , leon1/19-2	0.76 ± 0.01	272	p < 0.001
24B>dl-BRNAi , leon1/19-2	0.78 ± 0.01	274	p < 0.001
24B>cactRNAi , leon1/19-2	0.75 ± 0.01	274	p < 0.001
Figure 7B
genotype	Dlg zone thickness (mm)	n	Student's t test
24B-GAL4, leon1/19-2	1.6 ± 0.05	30	--
24B>UbqnRNAi#1, leon1/19-2	0.87 ± 0.03	31	p < 0.001
24B-GAL4, leon2/19-2	1.05 ± 0.04	33	--
24B>UbqnRNAi#1, leon2/19-2	0.83 ± 0.03	31	p < 0.001
Figure 7B
genotype	dPak intensity (fold)	n	Student's t test
24B-GAL4, leon1/19-2	1 ± 0.08	10	--
24B>UbqnRNAi#1, leon1/19-2	0.77 ± 0.07	10	p < 0.05
24B-GAL4, leon2/19-2	1. ± 0.09	10	--
24B>UbqnRNAi#1, leon2/19-2	0.66 ± 0.05	10	p < 0.01
Figure 7B
genotype	GluRIIA intensity (fold)	n	Student's t test
24B-GAL4, leon1/19-2	1 ± 0.12	10	--
24B>UbqnRNAi#1, leon1/19-2	0.6 ± 0.04	10	p < 0.01
24B-GAL4, leon2/19-2	1. ± 0.07	10	--
24B>UbqnRNAi#1, leon2/19-2	0.63 ± 0.05	10	p < 0.001
Figure 7B
genotype	GluRIIA diameter (mm)	n	Student's t test
24B-GAL4, leon1/19-2	1.14 ± 0.01	303	--
24B>UbqnRNAi#1, leon1/19-2	0.78 ± 0.01	315	p < 0.001
24B-GAL4, leon2/19-2	0.95 ± 0.01	345	--
24B>UbqnRNAi#1, leon2/19-2	0.76 ± 0.01	313	p < 0.001
Figure 7B
genotype	Synaptic FK2 intensity (fold)	n	Student's t test
24B-GAL4, leon1/19-2	1 ± 0.14	8	--
24B>UbqnRNAi#1, leon1/19-2	0.62 ± 0.05	8	p < 0.05
24B-GAL4, leon2/19-2	1 ± 0.05	9	--
24B>UbqnRNAi#1, leon2/19-2	0.46 ± 0.06	8	p < 0.001
Figure 7B
genotype	Muscular FK2 intensity (fold)	n	Student's t test
24B-GAL4, leon1/19-2	1 ± 0.19	8	--
24B>UbqnRNAi#1, leon1/19-2	0.72 ± 0.07	8	p = 0.19
24B-GAL4, leon2/19-2	1 ± 0.06	9	--
24B>UbqnRNAi#1, leon2/19-2	0.5 ± 0.08	8	p < 0.001
Figure 7D
genotype	Synaptic Ubqn intensity (fold)	n	Student's t test
w1118	1 ± 0.06	7	--
leon2/19-2	1.63 ± 0.16	7	p < 0.01
leon1/19-2	1.73 ± 0.17	7	p < 0.01
Figure 7D
genotype	Muscular Ubqn intensity (fold)	n	Student's t test
w1118	1 ± 0.08	7	--
leon2/19-2	1.2 ± 0.14	7	p = 0.24
leon1/19-2	1.21 ± 0.13	7	p = 0.20
Figure 7-figure supplement 1C
genotype	Dlg zone thickness (mm)	n	Student's t test
24B-GAL4, leon1/19-2	1.6 ± 0.05	30	--
24B>UbqnRNAi#2, leon1/19-2	0.86 ± 0.03	34	p < 0.001
24B>Rad23RNAi, leon1/19-2	1.57 ± 0.07	25	p = 0.79
24B>Ddi1RNAi, leon1/19-2	1.57 ± 0.04	26	p = 0.69
24B-GAL4, leon2/19-2	1.05 ± 0.04	33	--
24B>UbqnRNAi#2, leon2/19-2	0.85 ± 0.04	34	p < 0.001
24B>Rad23RNAi, leon2/19-2	1.24 ± 0.05	26	p < 0.01
24B>Ddi1RNAi, leon2/19-2	1.04 ± 0.05	25	p = 0.92
Figure 7-figure supplement 1C
genotype	GluRIIA intensity (fold)	n	Student's t test
24B-GAL4, leon1/19-2	1 ± 0.12	10	--
24B>UbqnRNAi#2, leon1/19-2	0.7 ± 0.06	10	p < 0.05
24B>Rad23RNAi, leon1/19-2	1.08 ± 0.13	10	p = 0.64
24B>Ddi1RNAi, leon1/19-2	1.13 ± 0.11	10	p = 0.45
24B-GAL4, leon2/19-2	1 ± 0.07	10	--
24B>UbqnRNAi#2, leon2/19-2	0.81 ± 0.04	10	p < 0.05
24B>Rad23RNAi, leon2/19-2	1.07 ± 0.08	10	p = 0.55
24B>Ddi1RNAi, leon2/19-2	1.18 ± 0.08	10	p = 0.11
Figure 7-figure supplement 1C
genotype	GluRIIA diameter (mm)	n	Student's t test
24B-GAL4, leon1/19-2	1.14 ± 0.01	303	--
24B>UbqnRNAi#2, leon1/19-2	0.81 ± 0.01	351	p < 0.001
24B>Rad23RNAi, leon1/19-2	1.11 ± 0.01	347	p = 0.06
24B>Ddi1RNAi, leon1/19-2	1.13 ± 0.01	356	p = 0.54
24B-GAL4, leon2/19-2	0.95 ± 0.01	345	--
24B>UbqnRNAi#2, leon2/19-2	0.8 ± 0.01	350	p < 0.001
24B>Rad23RNAi, leon2/19-2	0.98 ± 0.01	352	p = 0.06
24B>Ddi1RNAi, leon2/19-2	0.97 ± 0.01	368	p = 0.17
Figure 8B
genotype	Dlg zone thickness (mm)	n	Student's t test
24B-GAL4	0.68 ± 0.01	35	--
24B>Flag-Ubqn	0.9 ± 0.02	33	p < 0.001
24B>UbqnRNAi	0.68 ± 0.02	31	p = 0.88
Figure 8B
genotype	GluRIIA intensity (fold)	n	Student's t test
24B-GAL4	1 ± 0.08	10	--
24B>Flag-Ubqn	1.31 ± 0.1	10	p < 0.05
24B>UbqnRNAi	0.9 ± 0.05	10	p = 0.3
Figure 8B
genotype	GluRIIA diameter (mm)	n	Student's t test
24B-GAL4	0.65 ± 0.01	375	--
24B>Flag-Ubqn	0.79 ± 0.01	366	p < 0.001
24B>UbqnRNAi	0.65 ± 0.01	405	p = 0.81
Figure 9D
genotype	Dlg zone thickness (mm)	n	Student's t test
24B-GAL4	0.64 ± 0.01	26	--
24B>HA-UbGG	0.64 ± 0.01	26	p = 0.98
24B>HA-UbAA	0.82 ± 0.03	25	p < 0.001
24B>HA-UbAA-K48R	0.64 ± 0.02	24	p = 0.99
Figure 9D
genotype	dPAk intensity (fold)	n	Student's t test
24B-GAL4	1 ± 0.07	10	--
24B>HA-UbGG	1.02 ± 0.07	10	p = 0.84
24B>HA-UbAA	1.26 ± 0.06	10	p < 0.05
24B>HA-UbAA-K48R	0.91 ± 0.05	10	p = 0.33
Figure 9D
genotype	GluRIIA intensity (fold)	n	Student's t test
24B-GAL4	1 ± 0.03	10	--
24B>HA-UbGG	1.05 ± 0.08	10	p = 0.59
24B>HA-UbAA	1.39 ± 0.15	10	p < 0.05
24B>HA-UbAA-K48R	1.12 ± 0.06	10	p = 0.09
Figure 9D
genotype	GluRIIA diameter (mm)	n	Student's t test
24B-GAL4	0.63 ± 0.01	298	--
24B>HA-UbGG	0.61 ± 0.01	299	p = 0.18
24B>HA-UbAA	0.74 ± 0.01	297	p < 0.001
24B>HA-UbAA-K48R	0.64 ± 0.01	304	p = 0.39
Figure 9E
genotype	Dlg zone thickness (mm)	n	Student's t test
24B-GAL4, leon2/19-2	1.04 ± 0.05	33	--
24B>HA-UbAA, leon2/19-2	1.18 ± 0.04	33	p < 0.05
24B-GAL4, leon1/19-2	1.58 ± 0.05	31	--
24B>HA-UbAA, leon1/19-2	1.67 ± 0.06	30	p = 0.25
Figure 9E
genotype	GluRIIA intensity (fold)	n	Student's t test
24B-GAL4, leon2/19-2	1 ± 0.08	10	--
24B>HA-UbAA, leon2/19-2	1.29 ± 0.09	10	p < 0.05
24B-GAL4, leon1/19-2	1.18 ± 0.16	10	--
24B>HA-UbAA, leon1/19-2	1.26 ± 0.13	10	p = 0.68
Figure 9E
genotype	GluRIIA diameter (mm)	n	Student's t test
24B-GAL4, leon2/19-2	0.95 ± 0.01	365	--
24B>HA-UbAA, leon2/19-2	1.03 ± 0.01	309	p < 0.001
24B-GAL4, leon1/19-2	1.14 ± 0.01	311	--
24B>HA-UbAA, leon1/19-2	1.14 ± 0.01	309	p = 0.99
Figure 10B
genotype	Synaptic Ubqn intensity (fold)	n	Student's t test
24B-GAL4	1 ± 0.07	8	--
24B>HA-UbGG	1.09 ± 0.05	8	p = 0.32
24B>HA-UbAA	1.41 ± 0.07	8	p < 0.001
24B>HA-UbAA-K48R	1.08 ± 0.09	8	p = 0.57
Figure 10B
genotype	Muscular Ubqn intensity (fold)	n	Student's t test
24B-GAL4	1 ± 0.06	8	--
24B>HA-UbGG	1.17 ± 0.07	8	p = 0.07
24B>HA-UbAA	1.31 ± 0.06	8	p < 0.01
24B>HA-UbAA-K48R	1.07 ± 0.1	8	p = 0.55
Figure 10E
genotype	Synaptic FK2 intensity (fold)	n	Student's t test
+/19-2, 24B-GAL4	1 ± 0.08	8	--
+/19-2, 24B>HA-UbAA	1.49 ± 0.11	8	p < 0.01 to +/19-2, 24B-GAL4
+/19-2, 24B>Flag-Ubqn	1.23 ± 0.05	8	p < 0.05 to +/19-2, 24B-GAL4
+/19-2, 24B>HA-UbAA, Flag-Ubqn	2.04 ± 0.15	8	p < 0.001 to +/19-2, 24B-GAL4 and +/19-2, 24B>Flag-Ubqn; p < 0.05 to +/19-2, 24B>HA-UbAA
Figure 10E
genotype	Cact zone thickness (mm)	n	Student's t test
+/19-2, 24B-GAL4	0.65 ± 0.02	33	--
+/19-2, 24B>HA-UbAA	0.89 ± 0.03	32	p < 0.001 to +/19-2, 24B-GAL4
+/19-2, 24B>Flag-Ubqn	0.93 ± 0.02	34	p < 0.001 to +/19-2, 24B-GAL4
+/19-2, 24B>HA-UbAA, Flag-Ubqn	1.04 ± 0.02	35	p < 0.001 to +/19-2, 24B-GAL4; +/19-2, 24B>HA-UbAA and +/19-2, 24B>Flag-Ubqn
Figure 10E
genotype	GluRIIA intensity (fold)	n	Student's t test
+/19-2, 24B-GAL4	1 ± 0.11	10	--
+/19-2, 24B>HA-UbAA	1.88 ± 0.18	10	p < 0.001 to +/19-2, 24B-GAL4
+/19-2, 24B>Flag-Ubqn	1.88 ± 0.15	10	p < 0.001 to 19-2, 24B-GAL4
+/19-2, 24B>HA-UbAA, Flag-Ubqn	2.61 ± 0.18	10	p < 0.001 to +/19-2, 24B-GAL4; p < 0.05 to +/19-2, 24B>HA-UbAA; p < 0.01 +/19-2, 24B>Flag-Ubqn
Figure 10E
genotype	GluRIIA diameter (mm)	n	Student's t test
+/19-2, 24B-GAL4	0.66 ± 0.004	393	--
+/19-2, 24B>HA-UbAA	0.75 ± 0.01	406	p < 0.001 to +/19-2, 24B-GAL4
+/19-2, 24B>Flag-Ubqn	0.81 ± 0.01	413	p < 0.001 to 19-2, 24B-GAL4
+/19-2, 24B>HA-UbAA, Flag-Ubqn	0.99 ± 0.01	387	p < 0.001 to +/19-2, 24B-GAL4; +/19-2, 24B>HA-UbAA and +/19-2, 24B>Flag-Ubqn
