# Supplementary figures and images for: USP5/Leon deubiquitinase confines postsynaptic growth by maintaining ubiquitin homeostasis through Ubiquilin
Source: eLife journal article supplement (doi:10.7554/elife.26886), 2017-05-10

Figure 3-figure supplement 3

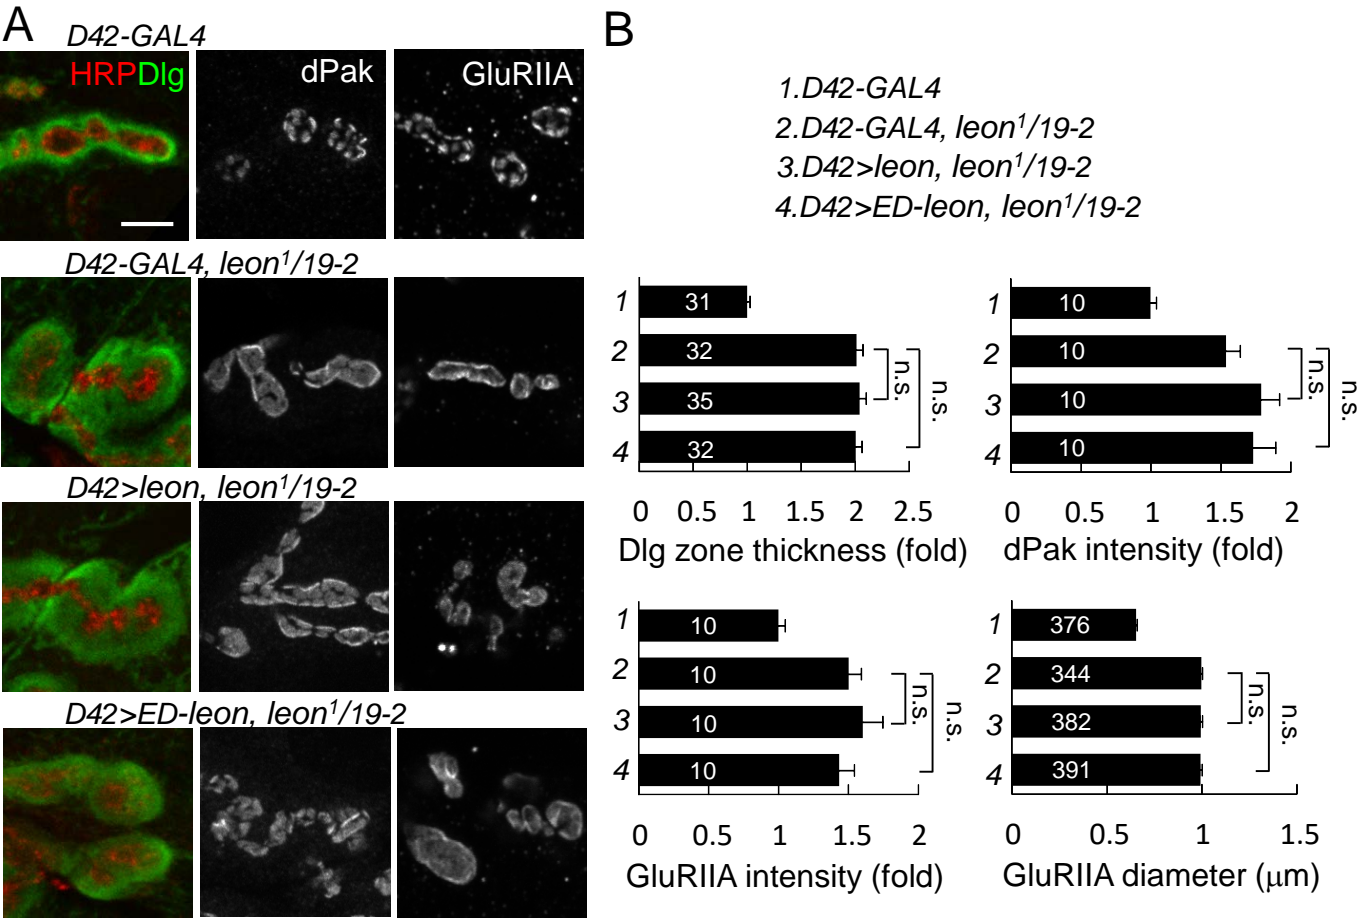

Supplement: supp [file elife-26886-supp-v1.zip]

Figure 5-figure supplement 1

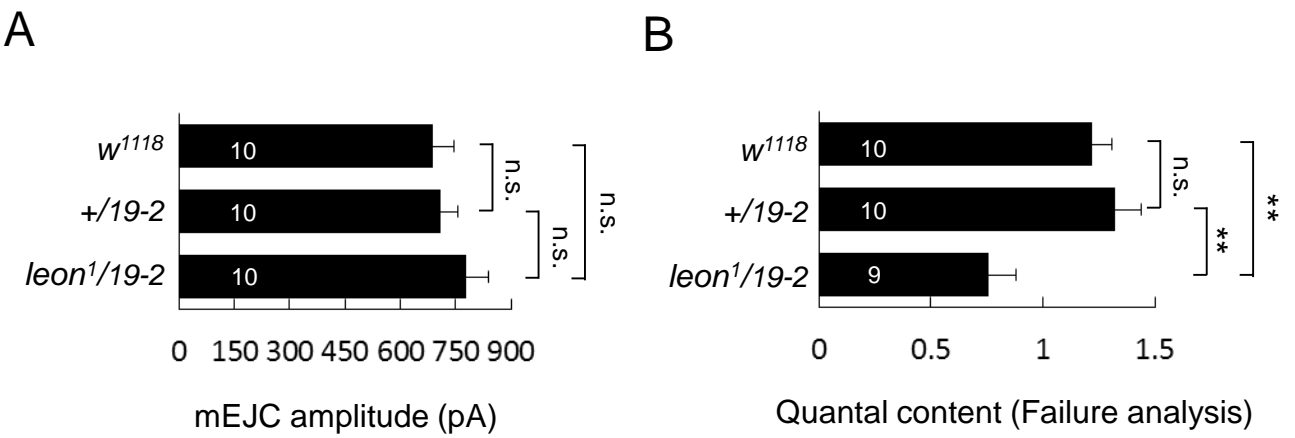

Supplement: supp [file elife-26886-supp-v1.zip]

Figure 3-figure supplement 4

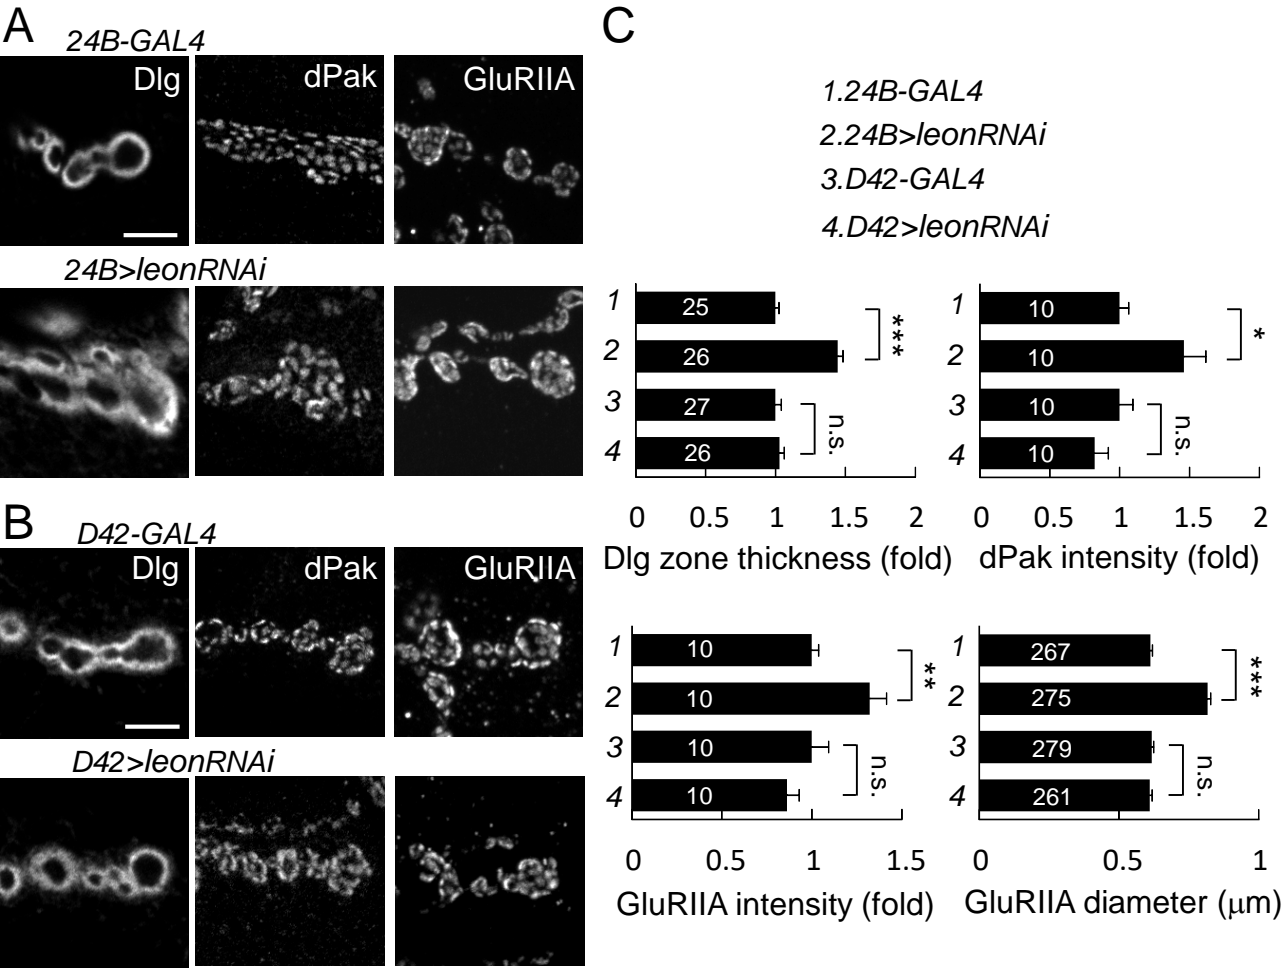

Supplement: supp [file elife-26886-supp-v1.zip]

Figure 3-figure supplement 2

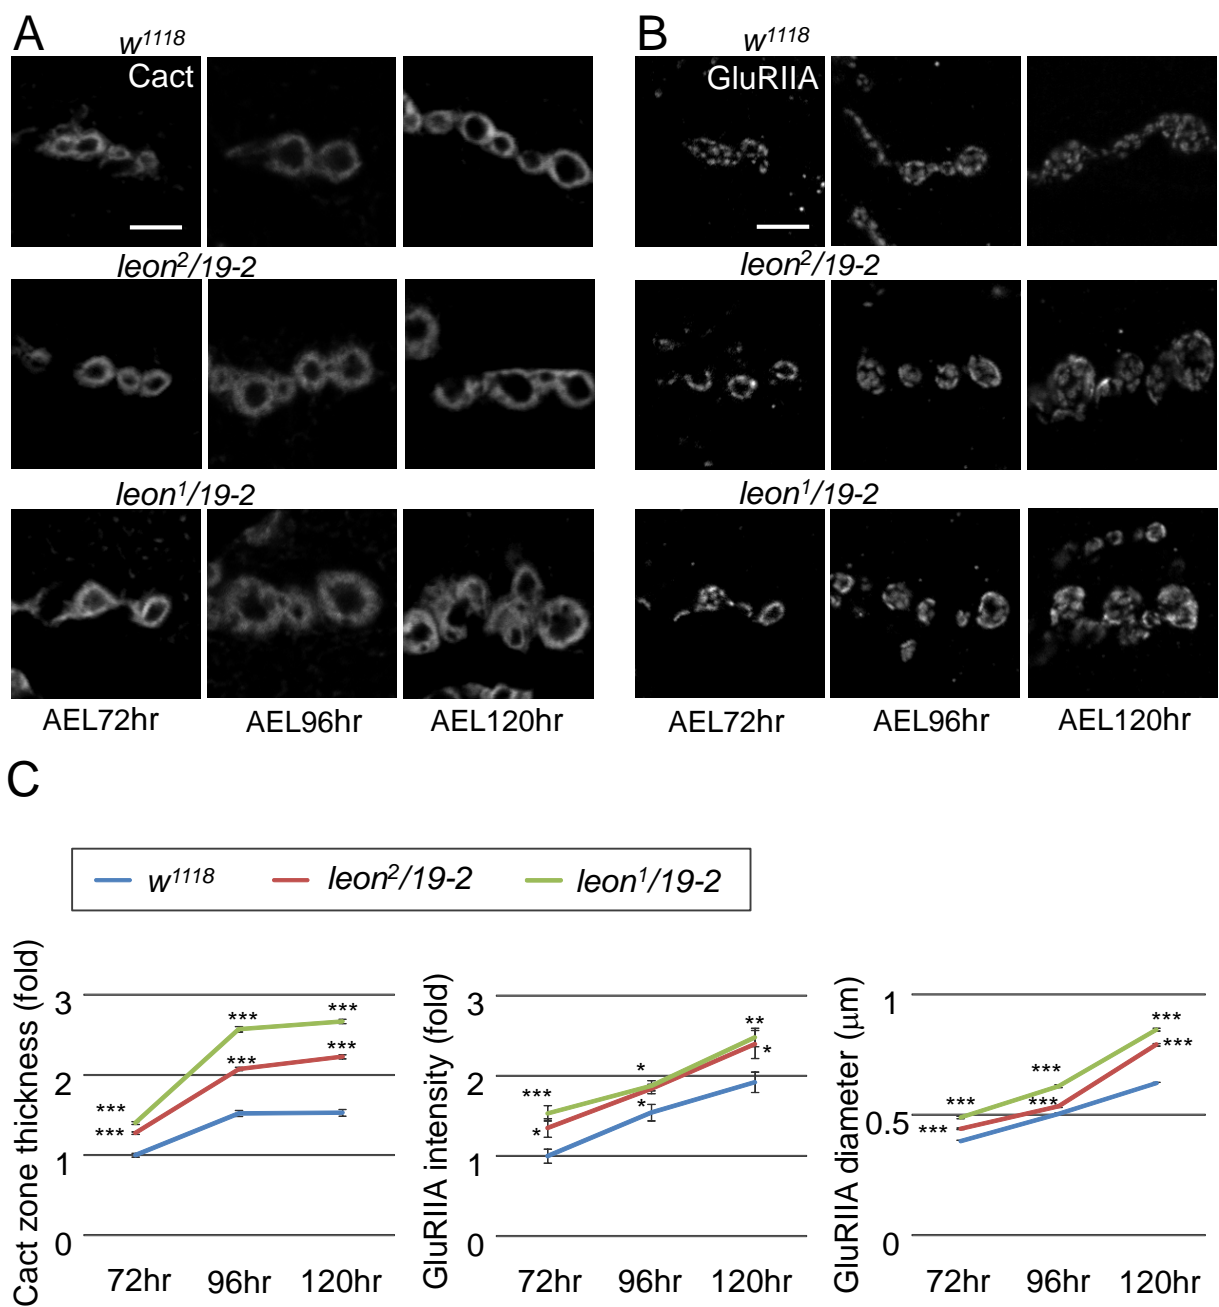

Supplement: supp [file elife-26886-supp-v1.zip]

Figure 1-figure supplement 1

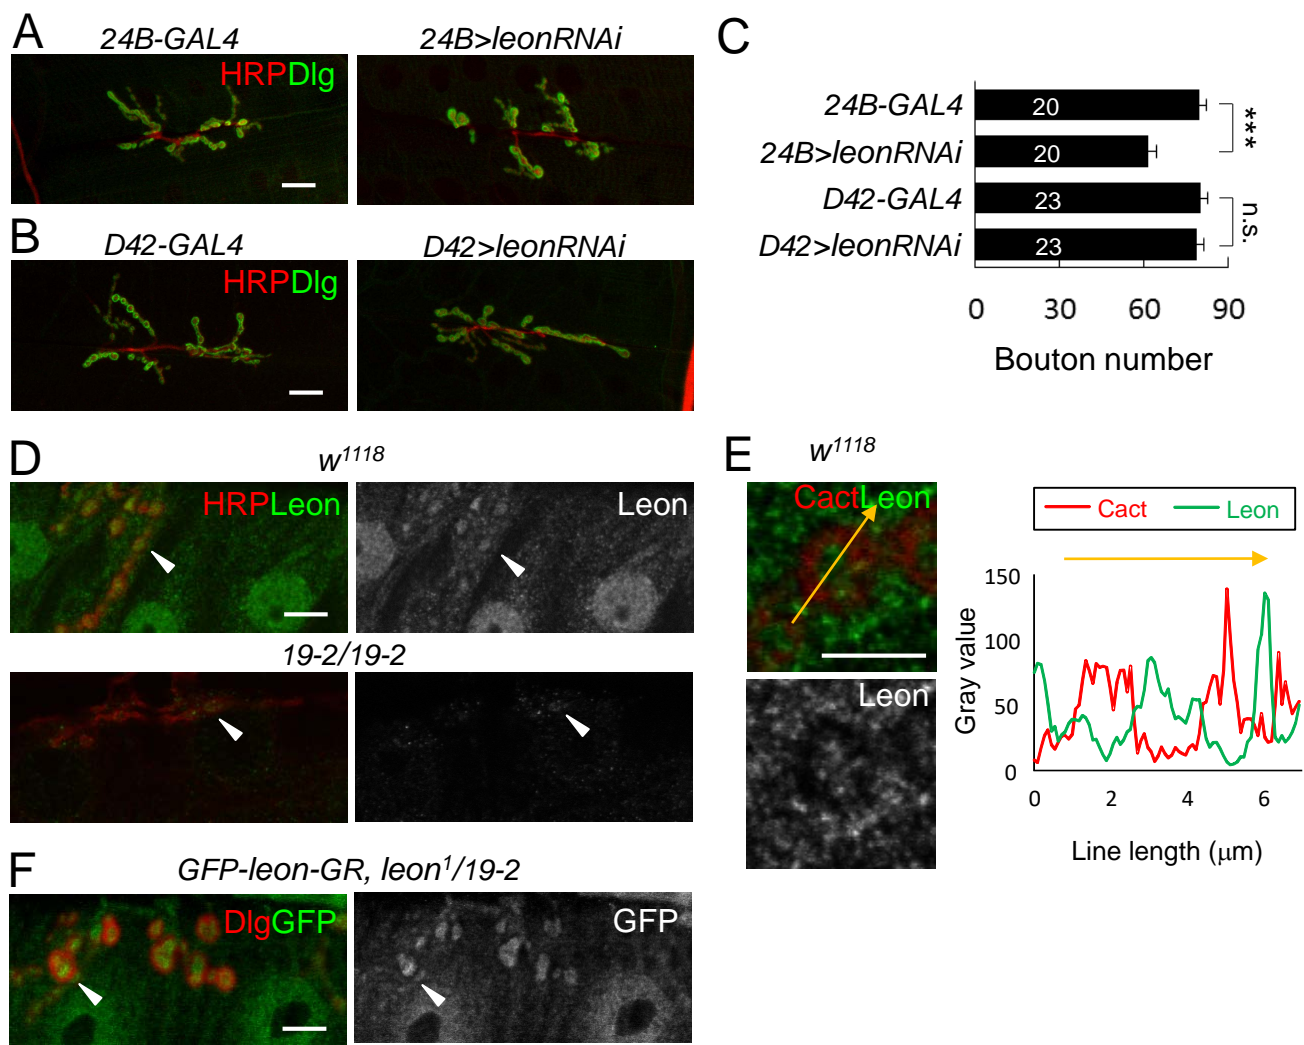

Supplement: supp [file elife-26886-supp-v1.zip]

Figure 6-figure supplement 1

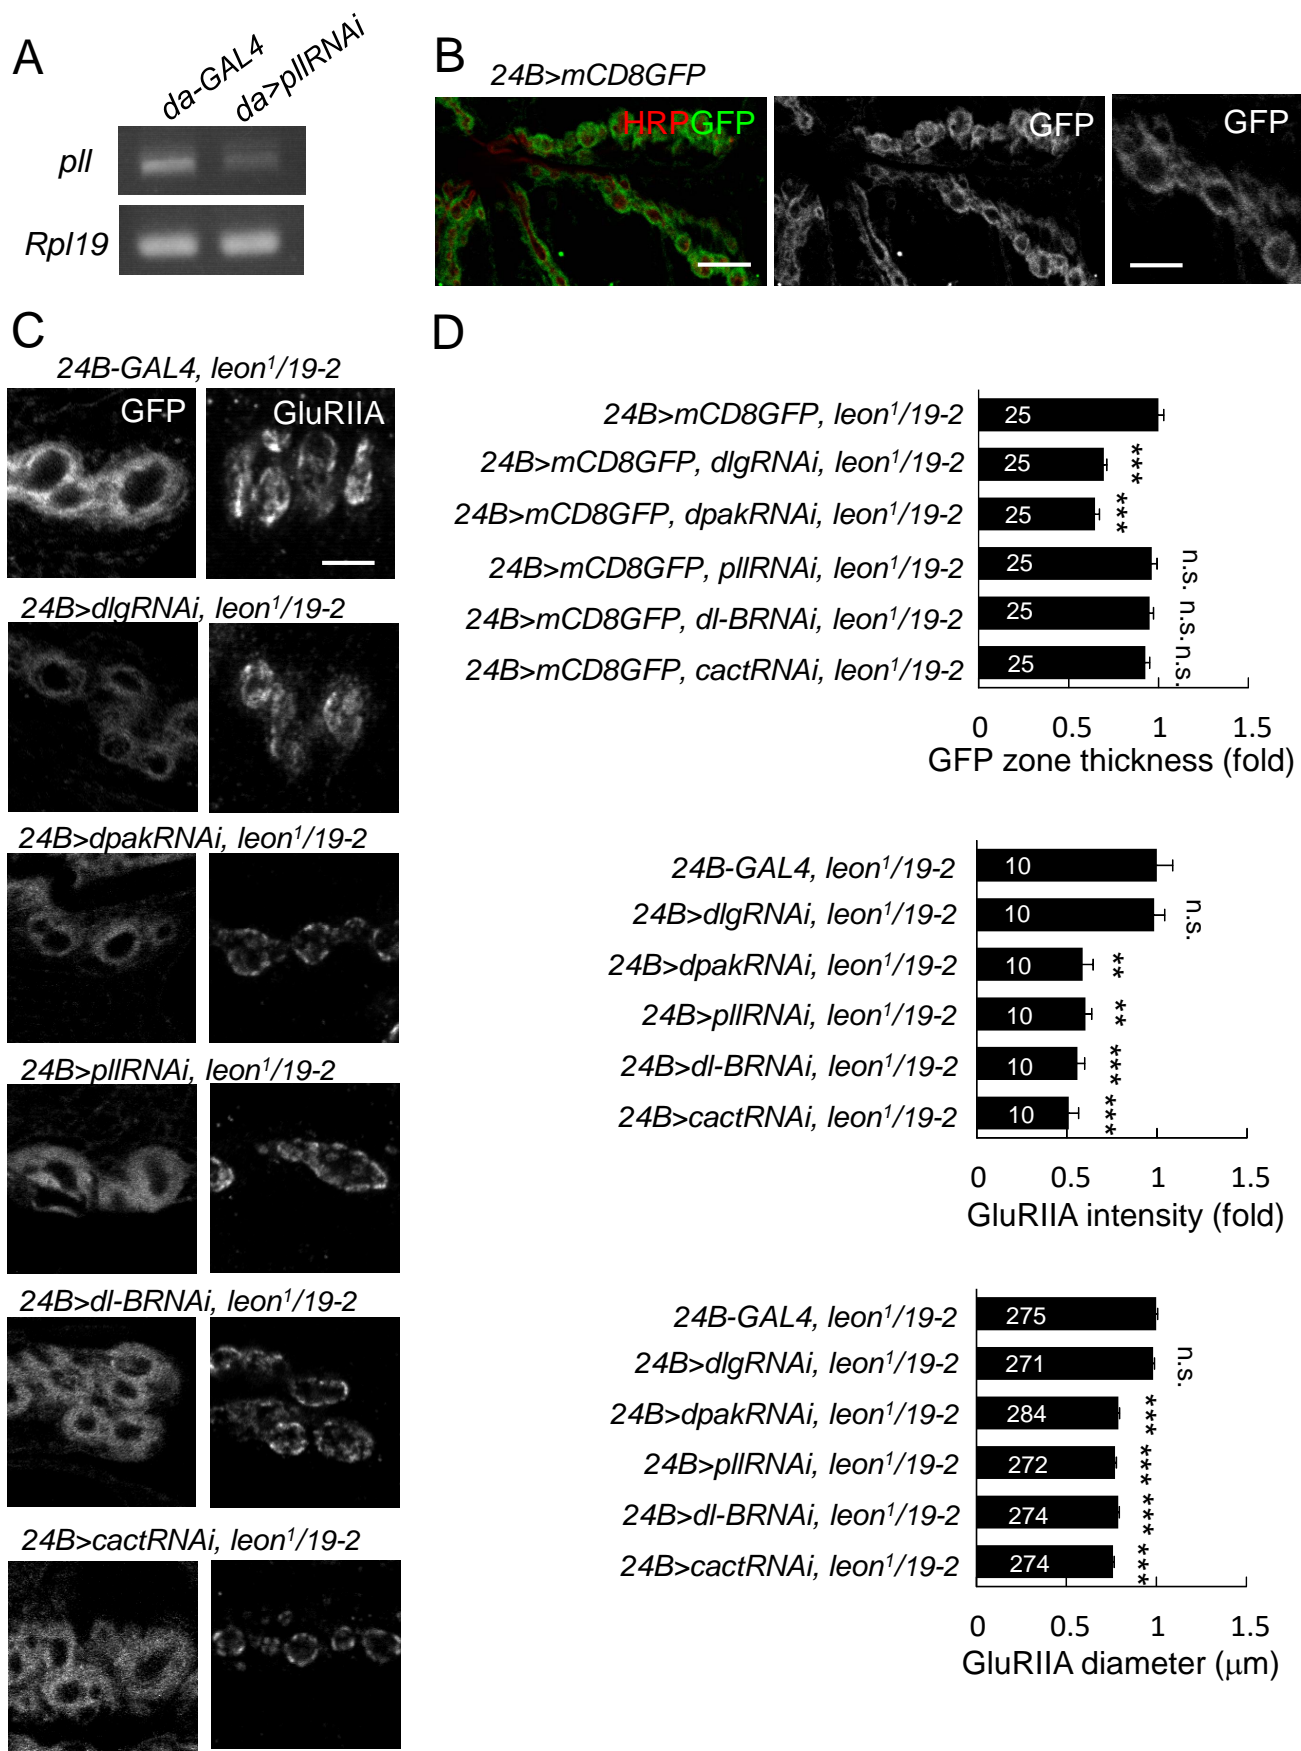

Supplement: supp [file elife-26886-supp-v1.zip]

**A**

da-GAL4 da>UbqRNAi#1 da>UbqRNAi#2 da-GAL4 da>Rad23RNAi da-GAL4 da>Ddi1RNAi

Ubq Rad23 Ddi1

Rpl19 Rpl19 Rpl19

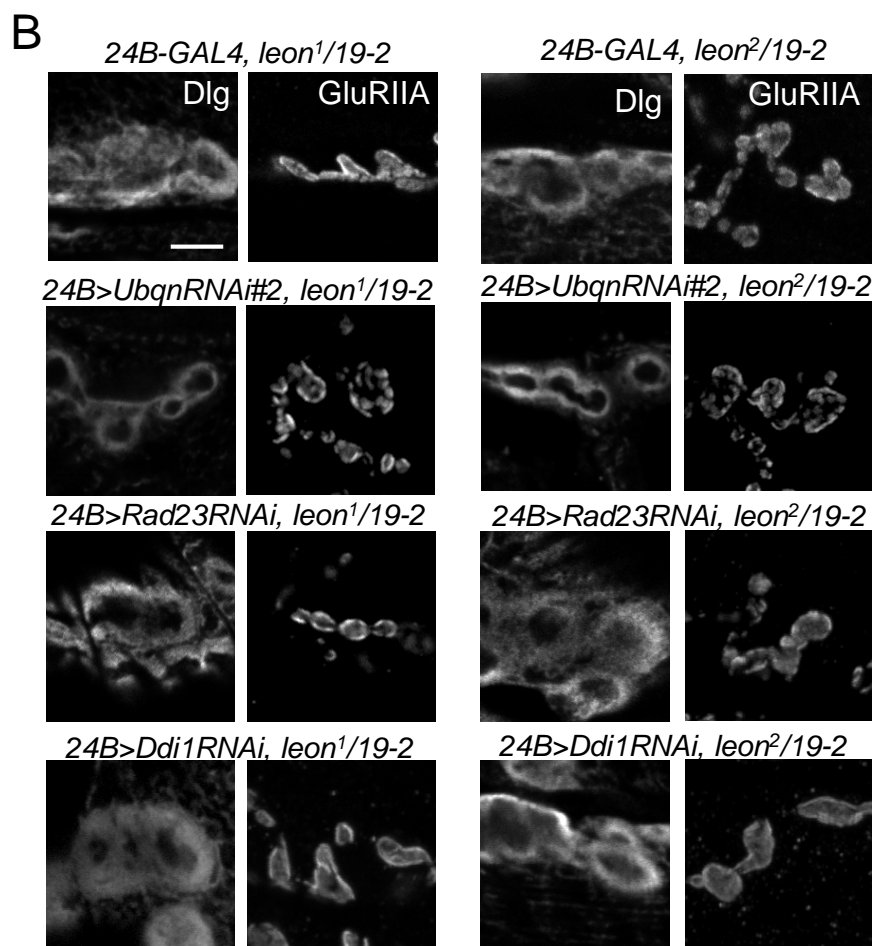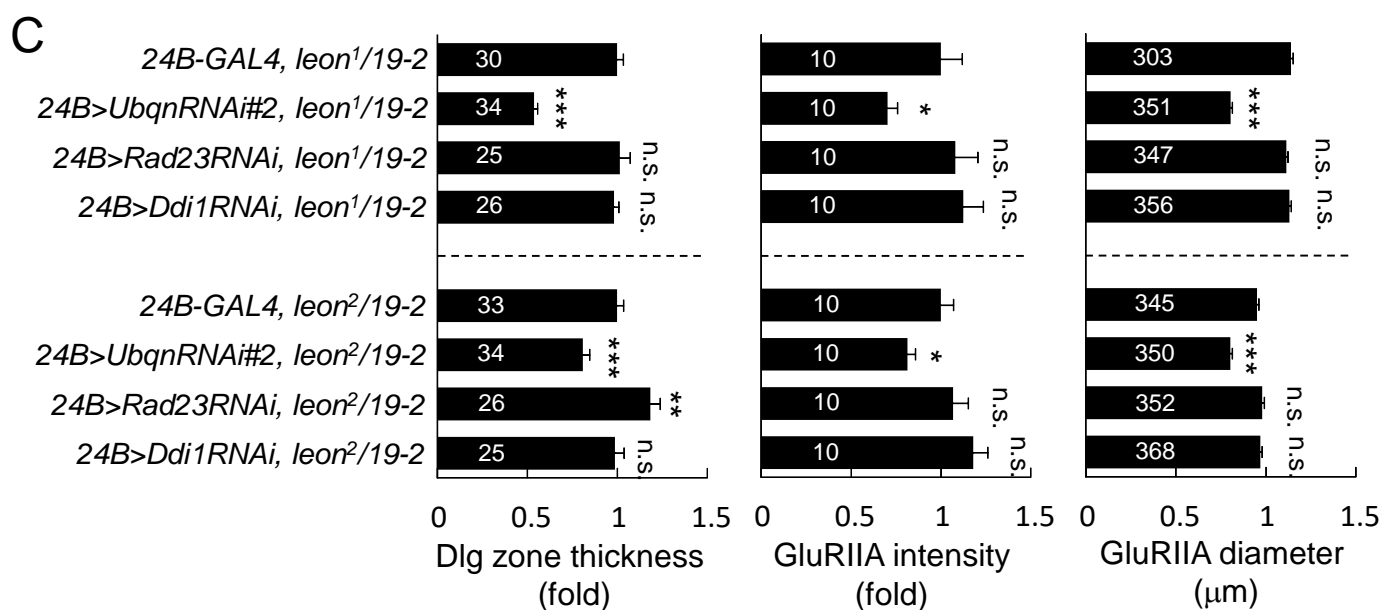

Supplement: supp [file elife-26886-supp-v1.zip]

Figure 3-figure supplement 1

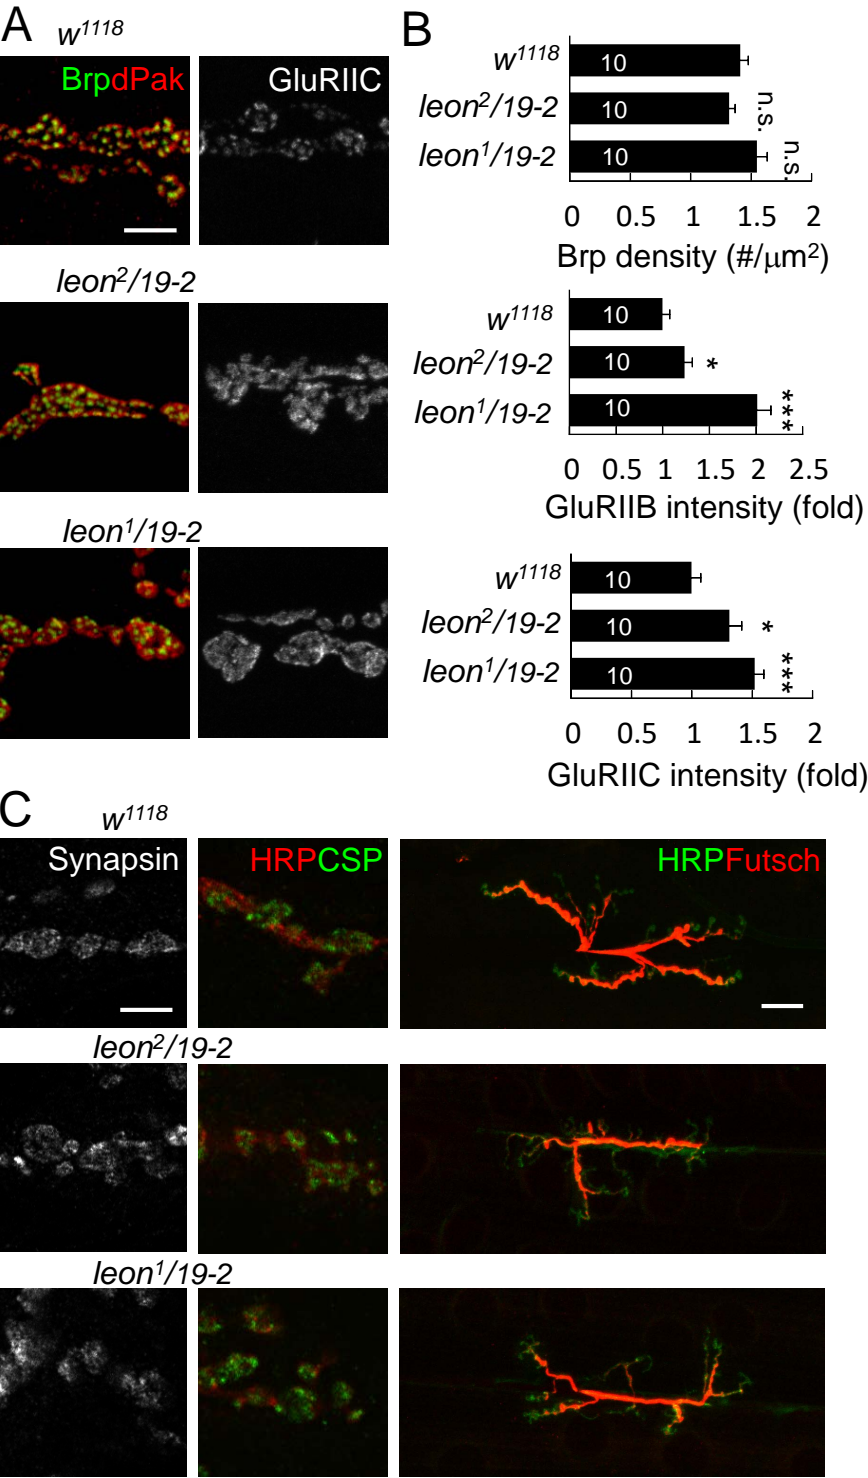

Supplement: supp [file elife-26886-supp-v1.zip]
